# Supplementary material for: Biochemical and MALDI-TOF Mass Spectrometric Characterization of a Novel Native and Recombinant Cystine Knot Miniprotein from Solanum tuberosum subsp. andigenum cv. Churqueña
Source: MDPI journal article supplement (doi:10.3390/ijms19030678), 2018-02-28
Supplement: s1 [file s1]

## SUPPLEMENTARY INFORMATION

### **Biochemical and MALDI-TOF mass spectrometric characterization of a novel native and recombinant cystine knot miniprotein from *Solanum tuberosum* subsp. *andigenum* cv. Churqueña**

Juliana Cotabarren <sup>1,†</sup>, Mariana Edith Tellechea <sup>1,2,†</sup>, Sebastián Martín Tanco <sup>2</sup>, Julia Lorenzo-Rivera <sup>2</sup>, Javier Garcia-Pardo <sup>3,\*</sup>, Francesc Xavier Avilés <sup>2,\*</sup> and Walter David Obregón <sup>1,\*</sup>

- <sup>1</sup> Centro de Investigación de Proteínas Vegetales (CIPROVE), Departamento de Ciencias Biológicas, Facultad de Ciencias Exactas, Universidad Nacional de La Plata, 47 y 115 s/N, B1900AVW, La Plata, Argentina; cotabarren.juliana@biol.unlp.edu.ar (J.C.), mariana.edith.tellechea@gmail.com (M.E.T.)
- <sup>2</sup> Institut de Biotecnologia i de Biomedicina, Universitat Autònoma de Barcelona, Campus Universitari 08193, Bellaterra, Cerdanyola del Vallès, Barcelona, Spain; sebastiantanco@gmail.com (S.M.T.), Julia.Lorenzo@uab.cat (J.L.R.).
- <sup>3</sup> Catalan Institute of Nanoscience and Nanotechnology (ICN2), CSIC and The Barcelona Institute of Science and Technology, Campus UAB, Bellaterra 08193, Barcelona, Spain.
- \* Correspondence: javiergarciapardo@msn.com (J.G.P), Tel.: +34-676-081557; FrancescXavier.Aviles@uab.cat (F.X.A.), Tel.: +34-606-873290; davidobregon@biol.unlp.edu.ar (W.D.O.), Tel.: +54-221-423-5333x57
- † These authors contributed equally to this work.

## **Supplementary Tables**

### **Table S1**

Table S1 is submitted as an attached EXCEL file (Table S1.xlsx).

## Supplementary Figures

Figure S1

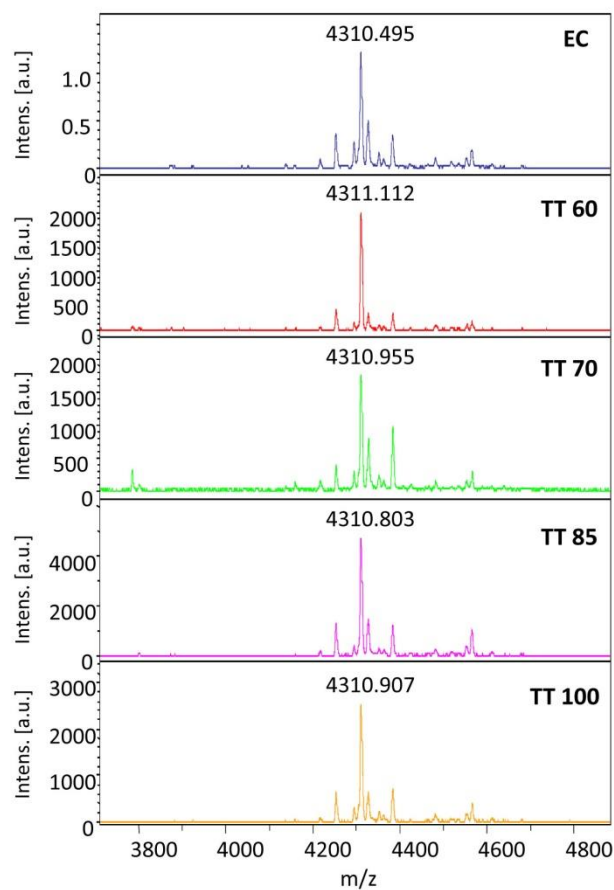

**Figure S1. MALDI-TOF mass spectrometric analysis of the crude extract and crude extract thermal treatments.** MALDI-TOF MS spectra of the non-treated crude extract (CE) and the same extract after incubation at (T60) 60, (T70) 70, (T85) 85 and (T100) 100 °C for 60 min. Numbers above the major peaks indicate the average masses of the  $MH^+$  ion ( $m/z$ ). The peaks with a mass of about 4310 Da corresponds to a potential carboxypeptidase A inhibitor with a molecular mass of 4309 Da.

Figure S2

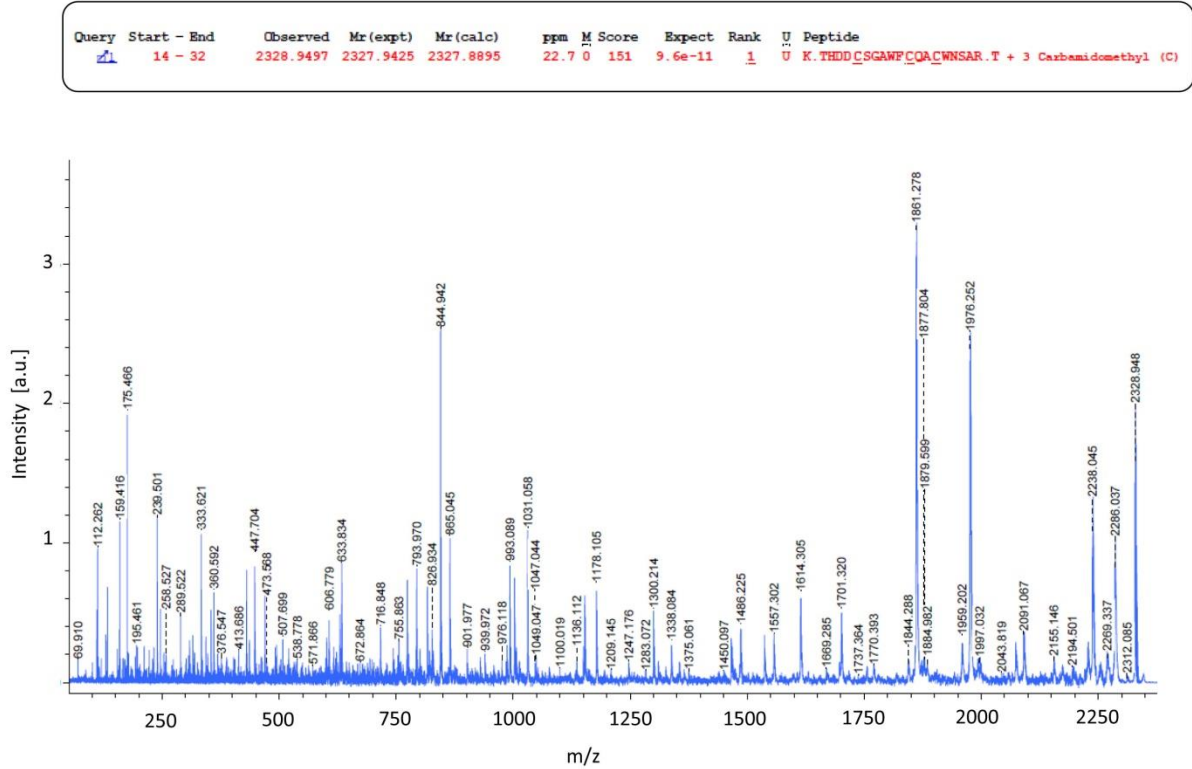

Figure S2. MALDI-TOF/TOF fragmentation spectrum of the precursor ion  $MH^+ 2328.950$ . The inset above the spectrum shows the result obtained from the online MASCOT search.

Figure S3

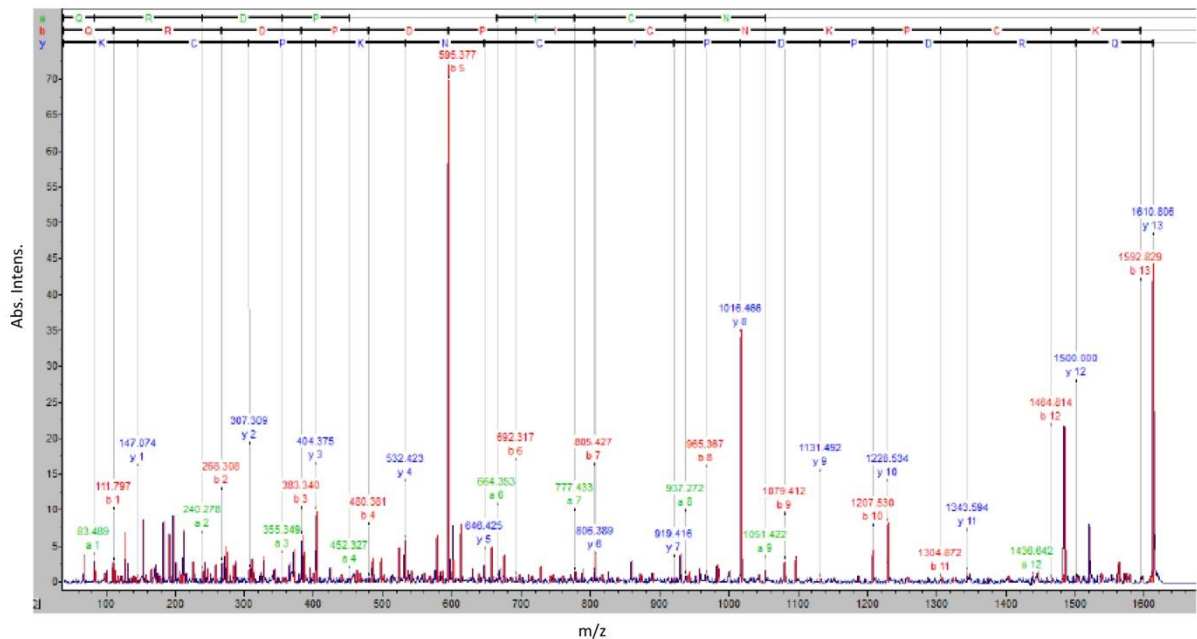

Figure S3. Representative *de novo* sequencing based on the MALDI-TOF/TOF fragmentation spectrum obtained for the precursor ion  $MH^+ 1610.788$ .
